# Supplementary material
Source: HighWire-hosted journal article supplement (https://tobaccocontrol.bmj.com/highwire/filestream/147312/field_highwire_adjunct_files/0/TC_Appendix_038711.docx)
Supplement: TC_Appendix_038711.docx [file TC_Appendix_038711.docx]

**Appendix: Data Sources used or referenced**

| **Survey** | **Agency** | **Years** | **Measures** |
| --- | --- | --- | --- |
| Tobacco Use Supplement to the Current Population Survey | NCI, CDC | 1992-1993 1995-1996 1998-1999 2001-2002 2003  2006-2007 | Smoke-free homes with children ≤ 6 years |
| Child Immunization Files of the National Health Interview Survey | NCHS, CDC | 2000-2003 | ≥3 dosages PCV7 among children ≤ 6 years |
| National Immunization Survey | NCIRD, NCHS, CDC | 2000-2006 | ≥3 dosages PCV7 among children aged 19- 35 months |
| National Ambulatory Medical Care Survey | NCHS | 1993-2006 | Annul physician office visits among children ≤ 6 years |
| National Hospital Ambulatory Medical Care Survey | NCHS | 1993-2006 | Annual emergency department visits and  hospital outpatient visits among children ≤ 6 years |
| National Hospital Discharge Survey | NCHS | 1993-2006 | Annual hospital discharges |
| Medical Expenditures Panel Survey | AHRQ | 2007 | Total medical expenditures for children ≤ 6 years |
| U.S. Census | U.S. Census Bureau | 1993-2006 | Children ≤ 6 years |
| National Household Education Surveys Program | NCES | 1993-2006 | Children in center-based child care arrangements |
| Annual Social and Economic Supplements, to the Current Population Survey | BLS | 1993-2006 | Children with any health insurance |
| Annual Social and Economic Supplements, to the Current Population Survey | BLS | 1993-2006 | Children living below 100% poverty level |

Agency Abbreviations: National Cancer Institute (NCI), Centers for Disease Control and Prevention (CDC), National Center for Health Statistics (NCHS), National Center for Immunizations and Respiratory Diseases (NCIRD), Agency for Healthcare Research and Quality (AHRQ), U.S. Department of Labor, Bureau of Labor Statistics (BLS),National Center for Education Statistics (NCES)
